# Supplementary material for: Femicide and Attempted Femicide before and during the COVID-19 Pandemic in Chile
Source: MDPI journal article supplement (doi:10.3390/ijerph19138012), 2022-06-30
Supplement: s1 [file s1]

**Table S1.** Mean quarterly rates/100,000 women before and during the COVID-19 pandemic

| Region             | Province          | Before Femicide | COVID Femicide | Before Attempted | COVID Attempted |
|--------------------|-------------------|-----------------|----------------|------------------|-----------------|
| Antofagasta        | Antofagasta       | 0.15            | 0.00           | 0.58             | 0.33            |
|                    | El Loa            | 0.23            | 0.25           | 0.70             | 0.51            |
|                    | Tocopilla         | 0.00            | 0.00           | 1.89             | 0.00            |
| Arica y Parinacota | Arica             | 0.09            | 0.20           | 0.96             | 1.41            |
|                    | Parinacota        | 0.00            | 0.00           | 3.52             | 0.00            |
| Atacama            | Copiapó           | 0.11            | 0.25           | 0.80             | 0.50            |
|                    | Chañaral          | 0.78            | 0.00           | 0.00             | 0.00            |
|                    | Huasco            | 0.13            | 0.00           | 0.39             | 0.63            |
| Aysén              | Coyhaique         | 0.34            | 0.81           | 0.86             | 0.81            |
|                    | Aysén             | 0.34            | 0.00           | 1.70             | 0.00            |
|                    | Capitán Prat      | 2.29            | 0.00           | 0.00             | 0.00            |
|                    | General Carrera   | 0.00            | 0.00           | 0.00             | 0.00            |
| Biobío             | Concepción        | 0.11            | 0.13           | 0.24             | 0.18            |
|                    | Arauco            | 0.23            | 0.00           | 0.17             | 0.56            |
|                    | Biobío            | 0.17            | 0.00           | 0.45             | 0.46            |
| Coquimbo           | Elqui             | 0.06            | 0.09           | 0.59             | 0.87            |
|                    | Choapa            | 0.22            | 0.00           | 0.33             | 0.52            |
|                    | Limarí            | 0.00            | 0.00           | 0.39             | 0.26            |
| La Araucanía       | Cautín            | 0.14            | 0.06           | 0.29             | 0.96            |
|                    | Malleco           | 0.28            | 0.22           | 0.74             | 1.35            |
| Los Lagos          | Llanquihue        | 0.21            | 0.11           | 0.66             | 0.22            |
|                    | Chiloé            | 0.17            | 0.00           | 0.62             | 0.81            |
|                    | Osorno            | 0.24            | 0.19           | 0.68             | 0.78            |
|                    | Palena            | 0.00            | 0.00           | 0.55             | 2.65            |
| Los Ríos           | Valdivia          | 0.36            | 0.31           | 0.42             | 2.01            |
|                    | Ranco             | 0.10            | 0.00           | 1.01             | 0.99            |
| Magallanes         | Magallanes        | 0.15            | 0.00           | 0.95             | 1.03            |
|                    | Antártica Chilena | 0.00            | 0.00           | 0.00             | 0.00            |

**Supplementary information**

***Femicide and attempted-femicide before and during the COVID-19 pandemic in Chile***

|                      |                  |      |      |      |      |
|----------------------|------------------|------|------|------|------|
|                      | Tierra del Fuego | 0.00 | 0.00 | 2.87 | 0.00 |
|                      | Última Esperanza | 0.00 | 0.00 | 0.86 | 0.00 |
| <b>Maule</b>         | Talca            | 0.11 | 0.43 | 0.21 | 0.21 |
|                      | Cauquenes        | 0.16 | 0.00 | 0.80 | 0.00 |
|                      | Curicó           | 0.20 | 0.00 | 0.39 | 0.31 |
|                      | Linares          | 0.13 | 0.16 | 0.40 | 0.16 |
| <b>Metropolitana</b> | Santiago         | 0.11 | 0.08 | 0.22 | 0.28 |
|                      | Cordillera       | 0.11 | 0.14 | 0.21 | 0.21 |
|                      | Chacabuco        | 0.15 | 0.32 | 0.35 | 0.00 |
|                      | Maipo            | 0.23 | 0.00 | 0.33 | 0.63 |
|                      | Melipilla        | 0.25 | 0.00 | 0.20 | 0.23 |
|                      | Talagante        | 0.13 | 0.15 | 0.26 | 0.44 |
| <b>Ñuble</b>         | Diguillín        | 0.11 | 0.00 | 0.26 | 0.14 |
|                      | Itata            | 0.17 | 0.83 | 0.34 | 0.00 |
|                      | Punilla          | 0.26 | 0.00 | 0.79 | 1.26 |
| <b>O'Higgins</b>     | Cachapoal        | 0.24 | 0.07 | 0.67 | 0.28 |
|                      | Cardenal Caro    | 0.63 | 0.99 | 0.42 | 0.00 |
|                      | Colchagua        | 0.09 | 0.00 | 0.35 | 0.62 |
| <b>Tarapaca</b>      | Iquique          | 0.07 | 0.15 | 1.14 | 1.16 |
|                      | Tamarugal        | 0.00 | 1.86 | 0.43 | 0.00 |
| <b>Valparaíso</b>    | Valparaíso       | 0.02 | 0.40 | 0.35 | 0.75 |
|                      | Isla de Pascua   | 0.00 | 0.00 | 4.05 | 6.02 |
|                      | Los Andes        | 0.45 | 0.00 | 0.45 | 0.00 |
|                      | Petorca          | 0.24 | 0.00 | 0.00 | 0.58 |
|                      | Quillota         | 0.05 | 0.22 | 0.37 | 0.44 |
|                      | San Antonio      | 0.34 | 0.00 | 0.62 | 0.79 |
|                      | San Felipe       | 0.19 | 0.29 | 0.56 | 0.58 |
|                      | Marga Marga      | 0.08 | 0.12 | 0.16 | 0.37 |

**Table S2.** Characteristics of the event, victim and aggressor between cases that occurred before and during the COVID-19 pandemic

|                                                                                                                           | Femicide                                                           |                                                                |         | Attempted                                                             |                                                                  |         |
|---------------------------------------------------------------------------------------------------------------------------|--------------------------------------------------------------------|----------------------------------------------------------------|---------|-----------------------------------------------------------------------|------------------------------------------------------------------|---------|
| Characteristics                                                                                                           | Before<br>(n=261)                                                  | During<br>(n=49)                                               | P value | Before<br>(n=716)                                                     | During<br>(n=187)                                                | P value |
| Victim age, yr<br>No.<br>Median±IQR<br>15-29 yr<br>30-39 yr<br>40+ yr                                                     | 258<br>37.5 (28 to 49)<br>74 (28.7)<br>70 (27.1)<br>114 (44.2)     | 49<br>33 (22 to 46)<br>21 (42.9)<br>9 (18.4)<br>19 (38.8)      | 0.124   | 716<br>33 (27 to 43)<br>247 (34.5)<br>246 (34.4)<br>223 (31.1)        | 187<br>33 (26 to 41)<br>69 (36.9)<br>62 (33.2)<br>56 (29.9)      | 0.193   |
| Victim legal marital status, n (%)<br>No.<br>Married<br>Divorced<br>Separated<br>Single<br>Widowed                        | 258<br>115 (44.6)<br>22 (8.5)<br>0 (0.0)<br>116 (44.6)<br>6 (2.3)  | 48<br>15 (31.2)<br>1 (2.1)<br>0 (0.0)<br>31 (64.6)<br>1 (2.1)  | 0.068   | 715<br>235 (32.9)<br>40 (5.6)<br>0 (0.0)<br>428 (59.9)<br>12 (1.7)    | 184<br>37 (20.1)<br>17 (9.2)<br>1 (0.5)<br>127 (69.0)<br>2 (1.1) | 0.001   |
| Victim Nationality, (%)<br>Chilean<br>Non-Chilean                                                                         | 235 (90.0)<br>26 (10.0)                                            | 42 (85.7)<br>7 (14.3)                                          | 0.368   | 665 (92.9)<br>51 (7.19)                                               | 171 (91.4)<br>16 (8.6)                                           | 0.505   |
| Relationship with aggressor, n (%)<br><u>Husband</u><br><u>Cohabiting partner</u><br>Boyfriend<br>Former partner<br>Other | 86 (32.9)<br>97 (37.2)<br>7 (2.7)<br>51 (19.5)<br>20 (7.7)         | 8 (16.3)<br>20 (40.8)<br>2 (4.1)<br>9 (18.4)<br>10 (20.4)      | 0.023   | 151 (21.1)<br>323 (45.1)<br>9 (1.3)<br>227 (31.7)<br>6 (0.8)          | 24 (12.8)<br>96 (51.3)<br>5 (2.7)<br>58 (31.0)<br>4 (2.1)        | 0.020   |
| Children Together, n (%)                                                                                                  | 94 (36.0)                                                          | 9 (18.4)                                                       | 0.016   | 357 (49.9)                                                            | 75 (40.1)                                                        | 0.017   |
| Aggressor age, yr<br>Median (IQR)                                                                                         | 40 (32 to 53)                                                      | 35 (28 to 54)                                                  | 0.173   | 37 (29 to 46)                                                         | 35 (27 to 45)                                                    | 0.051   |
| Aggressor Nationality, n (%)<br>Chilean<br>Non-Chilean                                                                    | 239 (91.6)<br>22 (8.4)                                             | 40 (81.6)<br>9 (18.4)                                          | 0.064   | 671 (93.7)<br>45 (6.3)                                                | 171 (91.4)<br>16 (8.6)                                           | 0.270   |
| Result, n (%)<br>Arrest<br>Escape<br>Suicide<br>Attempted Suicide<br>Other                                                | 144 (55.2)<br>29 (11.1)<br>74 (28.3)<br>5 (1.9)<br>9 (3.4)         | 33 (67.3)<br>11 (22.4)<br>5 (10.2)<br>0 (0.0)<br>0 (0.0)       | 0.011   | 531 (74.2)<br>158 (22.1)<br>19 (2.6)<br>2 (0.3)<br>6 (0.8)            | 143 (76.5)<br>39 (20.9)<br>3 (1.6)<br>1 (0.5)<br>1 (0.5)         | 0.854   |
| Place, n (%)<br>No.<br>Home<br>Victim Residence<br>Aggressor Residence<br>Other Residence<br>Street                       | 261<br>143 (54.8)<br>40 (15.3)<br>9 (3.4)<br>22 (8.4)<br>47 (18.0) | 49<br>22 (4.9)<br>11 (22.4)<br>1 (2.0)<br>5 (12.2)<br>9 (18.4) | 0.540   | 716<br>382 (53.3)<br>138 (19.3)<br>19 (2.6)<br>36 (5.0)<br>141 (19.7) | 185<br>99 (53.5)<br>42 (22.7)<br>8 (4.3)<br>4 (2.2)<br>32 (17.3) | 0.249   |
| Population, n (%)                                                                                                         |                                                                    |                                                                |         |                                                                       |                                                                  |         |

**Supplementary information**

***Femicide and attempted-femicide before and during the COVID-19 pandemic in Chile***

|                                                                                                                                                                                                |                                                                   |                                                                |                         |                                                                      |                                                                    |                         |
|------------------------------------------------------------------------------------------------------------------------------------------------------------------------------------------------|-------------------------------------------------------------------|----------------------------------------------------------------|-------------------------|----------------------------------------------------------------------|--------------------------------------------------------------------|-------------------------|
| <b>No.</b><br><b>Rural</b><br><b>Urban</b>                                                                                                                                                     | 261<br>54 (20.7)<br>207 (79.3)                                    | 48<br>9 (18.8)<br>39 (81.2)                                    | 0.759                   | 716<br>83 (11.6)<br>633 (88.4)                                       | 186<br>27 (14.5)<br>159 (85.5)                                     | 0.278                   |
| <b>Day of week, n (%)</b><br><b>Working days</b><br><b>Non-working days</b>                                                                                                                    | 85 (32.6)<br>176 (67.4)                                           | 21 (42.9)<br>28 (57.1)                                         | 0.164                   | 268 (37.4)<br>448 (62.6)                                             | 74 (39.6)<br>113 (60.4)                                            | 0.591                   |
| <b>Hour of day, n (%)</b><br><b>0:00 to 6:59</b><br><b>7:00 to 12:59</b><br><b>13:00 to 19:59</b><br><b>20:00 to 23:59</b>                                                                     | 81 (31.0)<br>60 (23.0)<br>71 (27.2)<br>49 (18.8)                  | 11 (22.4)<br>15 (30.6)<br>14 (28.6)<br>9 (18.4)                | 0.563                   | 245 (34.2)<br>160 (22.3)<br>177 (24.7)<br>134 (18.7)                 | 63 (33.7)<br>33 (17.6)<br>39 (20.9)<br>52 (27.8)                   | 0.038                   |
| <b>Weapon, n (%)</b><br><b>No.</b><br><b>Knives or cutting instruments</b><br><b>Firearms</b><br><b>Personal weapons (hands, feet)</b><br><b>Blunt objects</b><br><b>Other or not reported</b> | 255<br>126 (49.4)<br>45 (17.6)<br>7 (2.7)<br>9 (3.5)<br>68 (26.7) | 43<br>19 (44.2)<br>7 (16.3)<br>2 (4.6)<br>3 (7.0)<br>12 (27.9) | 0.659                   | 714<br>359 (50.3)<br>38 (5.3)<br>90 (12.6)<br>57 (8.0)<br>170 (23.8) | 185<br>85 (45.9)<br>15 (8.1)<br>50 (27.0)<br>10 (5.4)<br>25 (13.5) | 0.000                   |
| <b>Previous legal complaints, n (%)</b><br><b>Yes</b><br><b>Yes (Aggressor)</b><br><b>Precautionary measure (Aggressor)</b>                                                                    | 78 (29.9)<br>32 (12.3)<br>28 (10.7)                               | 23 (46.9)<br>17 (34.7)<br>5 (10.4)                             | 0.019<br>0.000<br>0.949 | 317 (44.3)<br>157 (21.9)<br>88 (12.3)                                | 110 (58.8)<br>64 (34.2)<br>15 (8.0)                                | 0.000<br>0.000<br>0.102 |

IQR: Interquartile range
